# Supplementary material for: Thermodynamic maximum of Y doping level in barium zirconate in co-sintering with NiO
Source: Royal Society of Chemistry journal article supplement (doi:10.1039/c8ta12245h), 2019-01-01
Supplement: c8ta12245h2.pdf [file c8ta12245h2.pdf]

## Electronic supplementary information

### Preparation of BZY powders

BZY powders were prepared by conventional solid state reaction method as follows. BaCO<sub>3</sub> (Wako Pure Chemical Industries, Ltd., Japan, 99.9 %), ZrO<sub>2</sub> (Tosoh Corporation, Japan, 97.031 %), Y<sub>2</sub>O<sub>3</sub> (Shin-Etsu Chemical Co, Ltd., Japan, 97.86 %) were used as raw materials and mixed at the desired ratios. The mixtures were ball-milled for more than 50 hours and calcined at 1000 °C for 10 hours. They were ball-milled again for about 40 hours, pressed into pellets under 9.8 MPa and synthesized at 1300 °C for 10 hours. After the heat-treatment, they were ball-milled for about 100 hours to pulverize.

### Data of phase diagram of BaO-ZrO<sub>2</sub>-Y<sub>2</sub>O<sub>3</sub>-NiO system at 1500 °C for *Tetraplot*

*Tetraplot* is a software to view a quaternary phase diagram programmed by Naoyuki Hatada (Kyoto University). *Tetraplot* can be downloaded at the following URL (<http://www.aqua.mtl.kyoto-u.ac.jp/tetraplot.html>). We prepared the data of partial phase diagram of BaO-ZrO<sub>2</sub>-Y<sub>2</sub>O<sub>3</sub>-NiO system at 1500 °C revealed in this study.
